# Supplementary material
Source: publisher figshare collection journal article supplement (https://tandf.figshare.com/ndownloader/files/12558629)
Supplement: Supplementary file 1 [file 12558629]

## Sheet: 工作表1
Supplementary Table 2. Summary of class assignments by T-BAS.
Class	Number of isolates	Percentage of isolates (%)	Number of OTU	Percentage of OTU (%)*
Dothideomycetes	2678	35.2	1257	32.3
Sordariomycetes	1965	25.8	1073	27.6
Leotiomycetes	1329	17.5	753	19.4
Pezizomycetes	868	11.4	415	10.7
Eurotiomycetes	612	8.1	356	9.2
Arthoniomycetes‡	18	0.2	8	0.2
Saccharomycetes‡	16	0.2	5	0.1
Orbiliomycetes‡	4	0.1	3	0.1
Coniocybomycetes‡	3	0	3	0.1
Lichinomycetes‡	1	0	1	0
Lecanoromycetes‡	1	0	1	0
Geoglossomycetes‡	1	0	1	0
Neolectomycetes‡	1	0	1	0
Excluded / Non-Ascomycota	107	1.4	NA	NA
*The data set contains 7604 isolates, which were assigned into 3886 OTU based on 100% sequence similarity. For analyses we used 95% similarity for OTU designations.
‡Other Ascomycota together are less than 1% of the total isolates.
NA: non-applicable.
